# Supplementary material
Source: MDPI journal article supplement (https://www.mdpi.com/search?q=agronomy-11-00466)
Supplement: s001 [file agronomy-11-00466-s001.pdf]

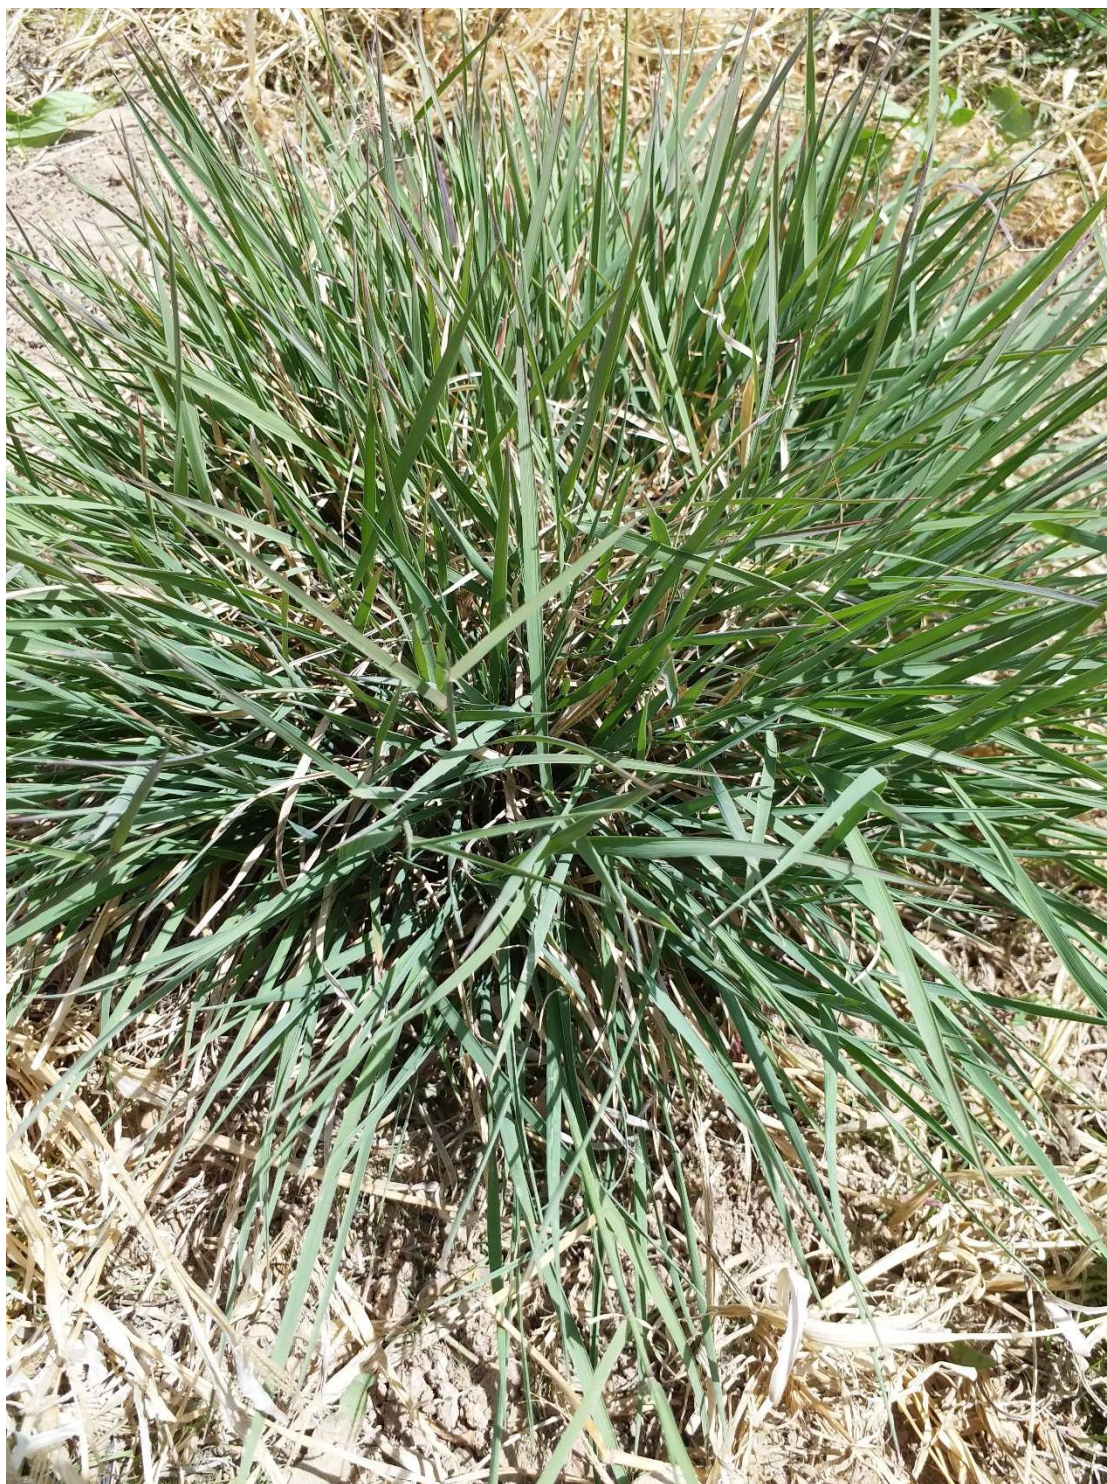

Figure S1. A picture of *Cleistogenes songorica* plant.

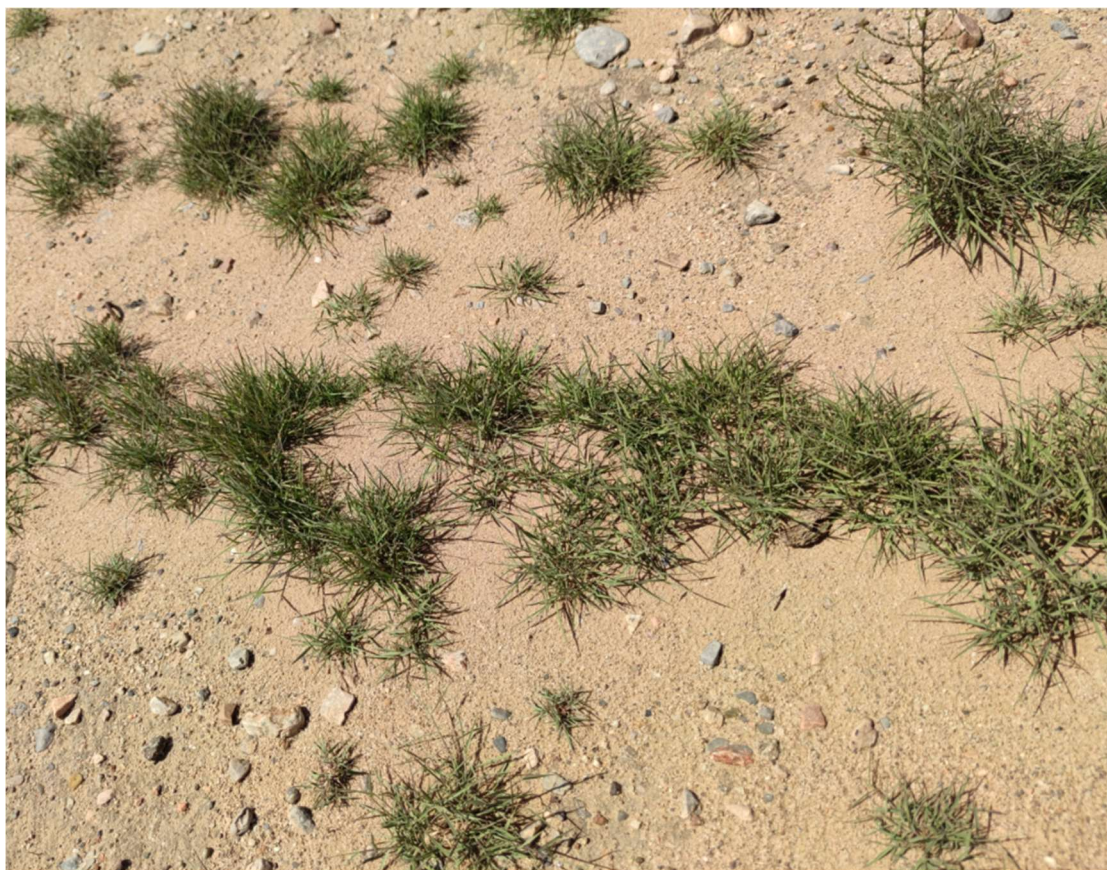

Figure S2. A picture of *Cleistogenes songorica* population in desert grassland.
